# Supplementary material
Source: HighWire-hosted journal article supplement (https://nutrition.bmj.com/content/bmjnph-2023-000674)
Supplement: inline-supplementary-material-1 [file inline-supplementary-material-1.pdf]

## Supplement File 1\_Additional Results

**SUPPLEMENT FILE 1**

Main Text Title- Adjunct Role of Potassium in Painful Rheumatoid Arthritis: A Randomized Controlled Study of Diet and Food Supplement based Intervention in Patients on Supervised Standard Care

**SUBJECT: Additional Efficacy Results**

Table 1: Median (Standard deviation, 95% confidence intervals) serum cortisol, serum and urine potassium over 16 weeks study period: A randomized controlled potassium-diet study in 172 patients of chronic rheumatoid arthritis on standard treatment[Arm A= potassium rich vegetarian diet, B= potassium rich vegetarian diet plus potassium food supplement, C=control routine diet]-per protocol analysis

| Variable         | Gp | Baseline    | 4 weeks    | 8 weeks     | 12 weeks  | 16 weeks   | p*   | P1   | P2   |
|------------------|----|-------------|------------|-------------|-----------|------------|------|------|------|
| Serum K (mEq/L)  | A  | 3.9 (0.5)   | 3.8 (0.4)  | 3.9(0.5)    | 3.9(0.5)) | 3.6 (0.5)  | 0.21 | 0.59 | 0.36 |
|                  | B  | 3.8(0.5)    | 3.8(0.4)   | 3.7 (0.4)   | 3.9 (0.5) | 3.9 (0.4)  | 0.35 |      |      |
|                  | C  | 3.9 (0.5)   | 3.7 (0.4)  | 3.7 (0.5)   | 4 (0.5)   | 3.8(0.5)   | 0.99 |      |      |
| Serum Na (mEq/l) | A  | 140 (6.6)   | 139 (5.1)  | 141.5 (5)   | 142 (6.7) | 139 (9.3)  | 0.52 | 0.67 | 0.41 |
|                  | B  | 140(5.4)    | 137 (4.7)  | 141.5 (9.8) | 142 (7.2) | 139 (9.1)  | 0.40 |      |      |
|                  | C  | 142 (6.1)   | 139 (4.3)  | 139 (6.1)   | 143 (8.9) | 140 (8.1)  | 0.49 |      |      |
| Urine K (mEq/l)  | A  | 37.6 (25.9) | 39 (39.1)  | 51.5(32.3)  | 65(42.1)  | 65.5(34.7) | 0.01 | 0.77 | 0.50 |
|                  | B  | 40 (26.1)   | 43 (29.6)  | 48 (34.1)   | 45 (23.6) | 59 (38.5)  | 0.02 |      |      |
|                  | C  | 34.8 (28.9) | 45 (39.8)  | 45 (30.4)   | 47 (27.8) | 55 (36.6)  | 0.00 |      |      |
| Urine Na (mEq/l) | A  | 105.5(79.2) | 81 (59.2)  | 95.5 (45.2) | 65(93.3)  | 117 (44.7) | 0.51 | 0.81 | 0.82 |
|                  | B  | 97(63.4)    | 94.5(84.4) | 98.5(70.8)  | 81(55.3)  | 116 (53.8) | 0.61 |      |      |

## Supplement File 1\_Additional Results

|                                                                                                                                                                                                                                                                                                                                                                                                                                                                                                                                                                                                                                                                  |   |           |           |           |           |           |      |      |      |
|------------------------------------------------------------------------------------------------------------------------------------------------------------------------------------------------------------------------------------------------------------------------------------------------------------------------------------------------------------------------------------------------------------------------------------------------------------------------------------------------------------------------------------------------------------------------------------------------------------------------------------------------------------------|---|-----------|-----------|-----------|-----------|-----------|------|------|------|
|                                                                                                                                                                                                                                                                                                                                                                                                                                                                                                                                                                                                                                                                  | C | 99(87.4)  | 104(66.6) | 100(58.5) | 101(55.4) | 105(43.9) | 0.53 |      |      |
| Serum Cortisol (µg/dl) (8-1030 am)                                                                                                                                                                                                                                                                                                                                                                                                                                                                                                                                                                                                                               | A | 5.7 (4.2) | 6.8 (3.9) | 7.6 (7.1) | 8.4 (8.9) | 8.2 (7.8) | 0.00 | 0.59 | 0.55 |
|                                                                                                                                                                                                                                                                                                                                                                                                                                                                                                                                                                                                                                                                  | B | 5.5 (4.8) | 6.5 (5.7) | 6.9(6.6)  | 9.4 (9)   | 8.9(8.5)  | 0.00 |      |      |
|                                                                                                                                                                                                                                                                                                                                                                                                                                                                                                                                                                                                                                                                  | C | 5.4 (4)   | 7.6 (7.6) | 6.3 (6.6) | 8.1 (7.6) | 7.1 (7)   | 0.01 |      |      |
| <p>Note: K: potassium; Na: sodium; Gp: group; Number of patients: 52 Arm A, 50 Arm B &amp; 53 Arm C; Number of Serum samples: 100% serum samples at baseline and completion and 90-94% other visits; Number of Spot Urine Potassium samples: least 48 available at each visit; Urine sample collected for spot urine K assay between 8-11 am; Blood collected for serum cortisol between 8-1030 am; Significant p&lt;0.05two-tailedd (ANOVA); No significant differences at p&lt;0.05 between groups at study visits using ANOVA ;p*: in-between group change: p1:baseline comparison ; p2: study completion (week 16) comparison; See main text for details</p> |   |           |           |           |           |           |      |      |      |

## Supplement File 1\_Additional Results

Table 2: Correlations (r) between potassium (K) related diet and laboratory variables at baseline and completion and with selected outcomes in patients with symptomatic rheumatoid arthritis (RA) randomized (n=172 patients) to a diet intervention drug trial; data pertains to 155 patient completers.

| Variable      | Diet K (B) | Diet K (C) | Serum K (B) | Serum K (C) | Urine K (B) | Urine K (C) |
|---------------|------------|------------|-------------|-------------|-------------|-------------|
| Diet K (B)    | 1          | 0.038      | -0.345**    | -0.127      | -0.056      | 0.085       |
| Diet K (C)    | 0.038      | 1          | -0.129      | 0.021       | 0.002       | -0.089      |
| Serum K (B)   | -0.345**   | -0.129     | 1           | 0.304**     | 0.086       | -0.09       |
| Serum K (C)   | -0.127     | 0.021      | 0.304**     | 1           | 0.03        | -0.94       |
| Urine K (B)   | -0.056     | 0.002      | 0.086       | 0.03        | 1           | 0.051       |
| Urine K (C)   | 0.085      | -0.089     | -0.09       | -0.94       | 0.051       | 1           |
| Pain VAS (C)  | -0.009     | -0.193*    | -0.081      | -0.068      | 0.114       | 0.115       |
| Pain MCID (C) | 0.114      | -0.191*    | -0.071      | -0.105      | 0.094       | 0.088       |
| DAS 28 (C)    | 0.018      | 0.006      | -0.041      | 0.029       | -0.008      | 0.079       |

Note: n:number; B:baseline; C:completion; Diet: daily estimation based on 'Food Composition Table (India); Urine K: spot morning urine assay; Pain VAS: pain visual analogue scale; MCID: minimum clinically important difference; DAS 28: disease activity score based on 28 joints; \*:p<0.05; \*\*:p<0.01; See methods above and main test for further explanation

## Supplement File 1\_Additional Results

Table 3: Efficacy variables of patients suffering from RA on standard of care treatment in intervention and control group (A; K rich diet , B; K rich diet + dietary K suppl C; routine diet): showing mean change (95% confidence interval) over study period (16 weeks) - an Intention to treat analysis.

| Variable                         | A(n=57)  |                           | B(n=58)  |                           | C(n=57)  |                          | P*<br>ANOVA |
|----------------------------------|----------|---------------------------|----------|---------------------------|----------|--------------------------|-------------|
|                                  | Baseline | Mean change               | Baseline | Mean change               | Baseline | Mean change              |             |
| Pain VAS (0-100mm)               | 5.42     | -1.31<br>(-1.93,-0.7)     | 5.41     | -1.98<br>(-2.62,-1.34)    | 5.26     | -1.24<br>(-1.8,-0.67)    | 0.17        |
| JCSW (range 0-66)                | 2.37     | -1.82<br>(-2.37,-1.27)    | 2.49     | -0.69<br>(-1.88,0.48)     | 2.44     | -1.60<br>(-2.61,-0.6)    | 0.2         |
| JCPT (range 0-68)                | 11.19    | -9.23<br>(-11.82,-6.64)   | 13.11    | -8.58<br>(-12.11,-5.05)   | 11.64    | -5.78<br>(-9.38-2.19)    | 0.27        |
| Patient Assess (Grade 1-5)       | 1.35     | -0.42<br>(-0.58,-0.27)    | 1.35     | -0.41<br>(-0.63,-0.19)    | 1.41     | -0.5<br>(-0.69,-0.3)     | 0.21        |
| HAQ (range 0-24)                 | 5.32     | -1.89<br>(-2.85,-0.93)    | 5.11     | -2.14<br>(-3.38,-0.91)    | 4.5      | -0.72<br>(-1.73,0.27)    | 0.13        |
| General Health (0-100 mm VAS)    | 51.03    | 13.44<br>(8.05,18.83)     | 51.49    | 13.41<br>(6.76,20.06)     | 50.91    | 10.30<br>(4.58,16.02)    | 0.68        |
| SF36 Physical score              | 42.03    | 1.78<br>(-0.3, 3.87)      | 41.48    | 2.83<br>(0.40, 5.26)      | 43.28    | 0.31<br>(-1.38, 2.01)    | 0.23        |
| SF36 Mental score                | 40.20    | 2.5673<br>(-0.01,5.15)    | 41.05    | 1.30<br>(-0.94, 3.55)     | 40.80    | 2.29<br>(-0.43, 5.02)    | 0.76        |
| ESR mm fall 1 <sup>st</sup> hour | 70.62    | -8.38<br>(-15.62, -1.13)  | 69.03    | -10.88<br>(-18.75, -3.02) | 65.08    | -9.29<br>(-15.95, -2.63) | 0.88        |
| CRP mg/dl                        | 33.85    | -22.02<br>(-35.16, -8.87) | 26.61    | -8.33<br>(-15.90, -0.75)  | 25.6     | -11.74<br>(-23.55, 0.06) | 0.2         |
| DAS 28 ESR                       | 4.91     | -1.46<br>(-1.79, -1.14)   | 5.01     | -1.18<br>(-1.60, -0.77)   | 4.83     | -1.02<br>(-1.44, -0.60)  | 0.25        |

Note: n: number of patients; VAS: visual analogue scale; JCSW: swollen joint count; JCPT: painful joint count; HAQ: health assessment questionnaire (function); SF 36 : Short Form 36 (quality of life); ESR: erythrocyte sedimentation rate; CRP:C-Reactive protein; DAS: disease activity index; Higher value/scores at baseline except for general health and SF 36 indicate worst outcome; Normal ranges are shown in parenthesis after variable; See Text for details

## Supplement File 1\_Additional Results

Table 4: Rheumatoid Arthritis Medication (number of patients) at randomization baseline (week 0) and study completion (week 16) in a randomized controlled three arm dietary potassium intervention study (n=172) in chronic Rheumatoid Arthritis [A= potassium rich diet; B=potassium rich diet plus potassium food supplement; C= control routine diet]

| Arm/ Drug                                                                                   | A              |              | B            |               | C            |              | p1*  | p2*  |
|---------------------------------------------------------------------------------------------|----------------|--------------|--------------|---------------|--------------|--------------|------|------|
| Time points/week                                                                            | 0<br>(n=57)    | 16<br>(n=52) | 0<br>(n=57)  | 16<br>(n=50)  | 0<br>(n=58)  | 16<br>(n=53) |      |      |
| <b>DMARD (Single or Combo) + Prednisolone/P (low dose steroid, 5 mg or less daily dose)</b> |                |              |              |               |              |              |      |      |
| DMARD (Single or combination) plus prednisolone-total                                       | 40             | 35           | 35           | 32            | 41           | 39           | 0.49 | 0.56 |
| Methotrexate(P)                                                                             | 16             | 13           | 20           | 17            | 12           | 17           | 0.2  | 0.29 |
| HCQS (P)                                                                                    | 8              | 0            | 2            | 1             | 6            | 2            | 0.12 | 0.46 |
| Sulfasalazine (P)                                                                           | 0              | 2            | 1            | 0             | 6            | 1            | 0.04 | 0.35 |
| Methotrexate + HCQS (P)                                                                     | 3              | 8            | 6            | 8             | 5            | 6            | 0.46 | 0.84 |
| Methotrexate + Sulfasalazine (P)                                                            | 8              | 8            | 4            | 4             | 5            | 7            | 0.57 | 0.42 |
| Sulfasalazine+ HCQS (P)                                                                     | 0              | 0            | 0            | 0             | 5            | 1            | 0.08 | 0.37 |
| Methotrexate + Sulfasalazine+ HCQS (P)                                                      | 5              | 4            | 2            | 2             | 2            | 5            | 0.34 | 0.35 |
| <b>DMARD Combination (no prednisolone)</b>                                                  |                |              |              |               |              |              |      |      |
| DMARD combination-total                                                                     | 11             | 12           | 13           | 12            | 11           | 10           | 0.89 | 0.41 |
| Methotrexate + Sulfasalazine                                                                | 5              | 5            | 3            | 3             | 3            | 5            | 0.76 | 0.98 |
| Methotrexate + HCQS                                                                         | 5              | 7            | 9            | 8             | 4            | 5            | 0.28 | 0.23 |
| Sulfasalazine+ HCQS                                                                         | 1              | 0            | 1            | 1             | 4            | 0            | 0.99 | 0.42 |
| <b>DMARD Mono</b>                                                                           |                |              |              |               |              |              |      |      |
| HCQS                                                                                        | 1              | 0            | 3            | 0             | 1            | 0            | 0.23 | 0.26 |
| Sulfasalazine                                                                               | 0              | 0            | 0            | 0             | 2            | 0            | -    | -    |
| Methotrexate                                                                                | 5              | 5            | 6            | 6             | 3            | 4            | 0.81 | 0.81 |
| <b>Total Use of DMARD (Single/Combo with or without Prednisolone)</b>                       |                |              |              |               |              |              |      |      |
| Methotrexate                                                                                | 47             | 50           | 50           | 48            | 34           | 49           | 0.00 | 0.60 |
| Sulfasalazine                                                                               | 19             | 19           | 11           | 10            | 27           | 19           | 0.01 | 0.14 |
| HCQS                                                                                        | 23             | 19           | 23           | 20            | 27           | 17           | 0.27 | 0.88 |
| <b>Analgesic/NSAID Use</b>                                                                  |                |              |              |               |              |              |      |      |
| Analgesic/NSAID                                                                             | 46(81)         | 40(75)       | 54(95)       | 39(75)        | 52(90)       | 43(81)       | 0.07 | 0.93 |
| Equivalent paracetamol daily use ^ , gm, mean (SD)                                          | 1.85<br>(0.82) | 1.37<br>-0.7 | 1.8<br>-0.77 | 1.41<br>-0.77 | 1.9<br>-0.85 | 1.46<br>-0.7 | 0.83 | 0.85 |

## Supplement File 1\_Additional Results

Note: n: number of study participants; DMARD: disease modifying antirheumatic drug; Analgesic/NSAID<sup>^</sup>: Daily Analgesic use in varying and/or fixed dose >4 times a week (includes non-steroidal anti-inflammatory drugs/NSAID) ; Daily paracetamol use<sup>^^</sup>: Combined use of paracetamol and Non-steroidal anti-inflammatory (NSAID) whereby NSAID use was converted into equivalent paracetamol dose by an equation decided a-priori by expert consensus (Each tablet of 50 Diclofenac/100 mg Nimesulide/60 mg Etorocoxib/300 mg etodolac were equated to 1000 mg paracetamol; \*p1: baseline comparison of groups; \*p2: completion comparison of groups; \*: chi-square statistic (Yates correction), degrees of freedom 2, significant p <0.05; See text for details

## Supplement File 1\_Additional Results

Table 5: Significant Pearson Moment correlation (r) between Diet nutrients and Energy Consumption at Baseline (B) and Study Completion (C) in patients with symptomatic RA randomized (n=172 patients) to a diet intervention drug trial; Data pertains to 155 patient completers.

| Diet Variable  | Positive 'r'                                                                                                                                                                       | Negative 'r'                                             |
|----------------|------------------------------------------------------------------------------------------------------------------------------------------------------------------------------------|----------------------------------------------------------|
| Potassium (B)  | Sodium , Iron (C),                                                                                                                                                                 | Protein(C),Zinc(C),Calcium (C),Thiamine (C) , Folic A(C) |
| Energy (B)     | Protein (B)*, Zinc (B)*,Calcium (B), Thiamine(B)*, Iron (B), Folic acid (B) **, Sodium (B), Protein (C ), Zinc(C ), Calcium (C ), Thiamine (C )*, Iron (C )*, Folic acid (C)*      |                                                          |
| Protein (B)    | Energy (B) *, zinc (B)*, calcium(B)*, thiamine (B)*, iron (B), folic acid (B) **, sodium (B), protein (C ), zinc(C ), calcium (C ), thiamine (C)*, iron (C) *                      | Nil                                                      |
| Fat (B)        | Nil                                                                                                                                                                                | Nil                                                      |
| Calcium (B)    | Energy (B), Protein (B)*, Zinc (B), Vitamin A (B), Thiamine (B) *, Iron (B)*, Folic acid (B) *, Sodium (B)*, Protein (C ), Thiamine (C ), Iron (C )                                | Nil                                                      |
| Thiamine (B)   | Energy (B) *, Protein (B)*, Zinc (B)*,Calcium (B)*, Iron (B)*, Folic acid (B) *, Sodium (B), Protein (C )*, Zinc (C ), Calcium (C ), Thiamine (C )*, Iron (C ) *, Folic acid (C )* | Nil                                                      |
| Vitamin C (B)  | Nil                                                                                                                                                                                | Calcium (C ), Thiamine (C ), Iron (C), Folic acid (C )   |
| Iron (B)       | Energy (B), Protein (B), Zinc (B), Calcium (B), Vitamin A (B), Thiamine (B) *, Folic acid (B), Sodium (B)                                                                          | Nil                                                      |
| Folic Acid (B) | Energy (B)*, Protein (B)*, Zinc (B)*, Calcium (B), Vitamin A (B), Thiamine (B)*, Iron (B)*, Sodium (B), Protein (C )*, Zinc (C ), Calcium (C ), Thiamine (C )*, Iron (C )          | Nil                                                      |
| Vitamin A (B)  | Calcium (B)*, Iron (B), Folic acid (B)                                                                                                                                             | Nil                                                      |
| Zinc (B)       | Protein (B)*, Thiamine (B)*, Iron (B), Calcium (B), Folic acid (B) *, Sodium (B), Protein (C ), Thiamine (C )*, Iron (C ), folic acid (C )                                         | Nil                                                      |
| Sodium(C)      | Energy (C)*, Protein (C)*, Fat (C), Zinc(C)*, Calcium (C)*, Phosphate(C), Thiamine (C)*, *Iron (C)*, Folic acid (C)*, Vitamin A(C), Potassium (C)                                  | Nil                                                      |
| Potassium (C)  | Energy (C), Protein (C)*, Fat (C), Zinc (C)*, Calcium (C ), Phosphate(C), Thiamine (C), Iron (C ), Folic acid (C), Sodium (C)*                                                     | Vit C (B)                                                |

Note: n: number ; Diet variables: measured as daily quantity based on standard 'Food Composition Tables (India)'; Abbreviations and acronyms: see above methods; Significance at p<0.05 two tailed; \* : p<0.01; See main text for further details

## Supplement File 1\_Additional Results

Table 6: Variables used in Univariate and Logistic Regression Analysis: Definition and Classification of Variables (dummy binary codes- 1 and 2) and Dependent Variables- A Randomized Assessor Blind three Arm Controlled Diet Intervention Study of Symptomatic Rheumatoid Arthritis (RA) (n=172 patients) of 16 Weeks Duration.

| Variables for Regression Analysis                | Variable Label    | Explanatory note / dummy code 1 (equivalent to Yes)                               |
|--------------------------------------------------|-------------------|-----------------------------------------------------------------------------------|
| Potassium /K_Arm                                 | K_Arm             | Arm A or B, consumed potassium                                                    |
| K diet arm                                       | K_5_diet arm      | Arm A only                                                                        |
| Age continuous (years)                           | Age               | continuous data                                                                   |
| Age stratified (years)                           | Age_40l           | age less than 40 years                                                            |
| Duration (years)                                 | R_5m              | 5 years or more                                                                   |
| Tobacco                                          | Tobacco           | Yes                                                                               |
| Menopause                                        | Menopause         | Yes                                                                               |
| BMI stratified                                   | BMI_25m           | 25Kg/m <sup>2</sup> and more=overweight and obesity                               |
| Joint count pain tender (JCPT)                   | JCPT_1_7m         | 7 joints or more painful or tender baseline                                       |
| Joint count swelling (JCSW)                      | JCSW_1_2m         | 2 joints or more swollen baseline                                                 |
| Health Assessment Questionnaire (HAQ)            | HAQ_1_6m          | 6 (total 24) or more disability score baseline, more disability                   |
| Physician global assess                          | PGA_1_3m          | 3 or more category physician global assess disease severity baseline              |
| Patient assessment disease (PAD)                 | PAD_!_3m          | 3 or more category patient global assess disease severity baseline                |
| General Health Assess (GHA)                      | GHA_1_60l         | 60mm (VAS) or less score baseline to show more poor health                        |
| Early Morning Stiffness (EMS)                    | EMS_1_30m         | 30 min or more morning stiff baseline, more severe disease                        |
| Rheumatoid Arthritis Pain Score (RAPS)           | RAPS_1_60m        | 60 or more baseline score for more pain                                           |
| Disease activity score (DAS)                     | DAS_!_5.1m        | DAS28 high on baseline > 5.1 more disease active                                  |
| Short Form Health Score-physical 36 item (SF36P) | SF36P_1_40l       | 40 or less score baseline for more physical disability                            |
| Short Form Health Score-mental 36 item (SF36M)   | SF36M_1_40l       | 40 or less score baseline for more mental disability                              |
| Erythrocyte Sediment Rate (ESR)                  | ESR_1_50m         | 50mm fall 1 <sup>st</sup> hour or more measure baseline for more disease severity |
| Serum Potassium (Sr K)                           | SrK_1_3.5l        | 3.5mEq/L or less assay baseline for lesser body potassium                         |
| Urine Potassium (K)                              | UrK_1_40m         | 40mg or more excretion baseline for more K loss                                   |
| C-reactive protein (CRP)                         | CRP_1_12m         | 12mg/dl or more assay baseline for more disease severity                          |
| Rheumatoid Factor (RF) titre                     | RF_1_120m         | 120 IU/l or more assay baseline for more seropositive RA                          |
| Anti-cyclic citrullinated peptide (CCP) assay    | CCP_1             | >5 RU/l                                                                           |
| Serum Cortisol (Sr Cort)                         | SrCort_1_7.5 less | Serum cortisol less than 7.5 mg baseline in more painful diseases                 |
| Serum Cortisol (Sr Cort)                         | SrCort_5_7.5 more | Serum cortisol more than 7.5 mg completion in less painful diseases               |



## Supplement File 1\_Additional Results

|                                             |                |                                                                     |
|---------------------------------------------|----------------|---------------------------------------------------------------------|
| Energy- daily diet consumption              | Energy_1_2700m | 2700 KCalories or more baseline Kcal consumption                    |
| Protein- daily diet consumption             | Prot_1_80m     | 80gm or more protein baseline consumption                           |
| Zinc-daily diet consumption                 | Zn_1_15m       | 15mg or more zinc baseline consumption                              |
| Vitamin C (Vit) daily consumption           | VitC_1_130m    | 130mg or more Vit C baseline consumption                            |
| Iron -daily diet consumption                | Iron_1_30m     | 30mg or more Iron baseline consumption                              |
| Potassium (K)-daily diet consumption        | K_1_2200l      | 2200 mg or less baseline consumption                                |
| Energy- daily diet consumption              | Energy_5_2700m | 2700 KCalories or more Kcal consumption on study completion         |
| Protein- daily diet consumption             | Prot_5_80m     | 80gm or more protein consumption on study completion                |
| Zinc-daily diet consumption                 | Zn_5_15m       | 15mg or more zinc consumption on study completion                   |
| Calcium consumption diet                    | Cal_5_800m     | 800 mg or higher calcium consumption study completion               |
| Vitamin C (Vit) daily consumption           | VitC_5_130m    | 130mg or more Vit C consumption on study completion                 |
| Iron -daily diet consumption                | iron_5_30m     | 30mg or more Iron consumption on study completion                   |
| Sodium (Na)-daily diet consumption          | Na_5_4000m     | 4000mg or more consumption on study completion                      |
| K daily diet consumption - completion       | K_5_5000m      | 5000mg or more consumption on study completion                      |
| K-daily diet consumption completion         | K_5_4000       | 4000mg or more consumption on study completion                      |
| K daily diet consumption - completion       | K_5_3000m      | 3000mg or more consumption RDA on study completion                  |
| Methotrexate (MTX) dose mg per week         | MTX_1_16m      | 16mg or more weekly dose baseline for more disease activity         |
| MTX use                                     | MTX_1_yes      | use of MTX at baseline                                              |
| MTX+SZP (sulfasalazine) consumption         | MTX_SZP_1_Yes  | use of MTX SZP at baseline                                          |
| Prednisolone (Pred) daily dose mg           | Pred_1_6m      | 6mg or more daily dose of prednisolone at baseline, more active dis |
| Pred use                                    | Pred_1_Yes     | Prednisolone use at baseline                                        |
| Non-steroidal inflammatory (NSAID) anti-use | NSAID_1_Yes    | NSAID use at baseline                                               |
| Combo use                                   | Combo_1_Yes    | Combination use of DMARD at baseline                                |
| Combo +Pred use                             | Combo_P_1_Yes  | Combination DMARD plus prednisolone at baseline                     |
| MTX use on completion                       | MTX_5_Yes      | MTX use on study completion                                         |
| MTX dose use on completion                  | MTX_5_16m      | MTX dose 16mg or more on study completion                           |
| Pred use on completion                      | Pred_5_Yes     | Pred use on study completion                                        |
| Pred dose on completion                     | Pred_5_6m      | Pred dose 6mg or more daily on study completion                     |
| Combo Use                                   | Combo_5-Yes    | Combination DMARD on completion                                     |

## Supplement File 1\_Additional Results

|                                                                                                                                       |                    |                                                                               |
|---------------------------------------------------------------------------------------------------------------------------------------|--------------------|-------------------------------------------------------------------------------|
| NSAID use on completion                                                                                                               | NSAID_5_Yes        | NSAID use on completion                                                       |
| <b>Pain on completion</b>                                                                                                             | <b>Pain_5_4l</b>   | <b>Dependent Variable : pain less than 4 cm on VAS on study completion</b>    |
| <b>Disease activity score using ESR less than 3.2</b>                                                                                 | <b>DAS28_5_low</b> | <b>Dependent Variable: DAS28 low disease or remission on study completion</b> |
| <b>Note: ; n: number; m:more;l:less; K: potassium; Combo: combination; MTX: methotrexate; Pred: prednisolone; SZP: sulfasalazine;</b> |                    |                                                                               |

## Supplement File 1\_Additional Results

Table 7: Odds Ratio (Association) of Diet Variable and Nutrients with Dependent Variable using Univariate analysis (Z test): A Randomized Assessor Blind three Arm Controlled Diet Intervention Study of Symptomatic Rheumatoid Arthritis (RA) (n=172 patients) of 16 Weeks Duration.

| Dependent Variable/<br>Diet related variable | Pain change MCID on study completion |                        | Pain VAS on study completion less than 4 cm (VAS) |                        | DAS28 score on study completion less than 3.2 |                        |
|----------------------------------------------|--------------------------------------|------------------------|---------------------------------------------------|------------------------|-----------------------------------------------|------------------------|
|                                              | OR                                   | 'Z' value <sup>€</sup> | OR                                                | 'Z' value <sup>€</sup> | OR                                            | 'Z' value <sup>€</sup> |
| K-arm                                        | 2.0134*                              | 2.0069                 | 1.5450                                            | 1.2749                 | 1.2613                                        | 0.6474                 |
| K-diet-arm                                   | 0.9300                               | -0.2061                | 0.9285                                            | -0.2152                | 1.1229                                        | 0.3203                 |
| SRK-1_3.5l                                   | 0.8467                               | -0.4363                | 0.6705                                            | -1.0712                | 1.3344                                        | 0.7539                 |
| URK-1_40m                                    | 0.5481                               | -1.8163                | 0.4711*                                           | -2.3234                | 1.3900                                        | 0.9675                 |
| Energy-1_2700m                               | 0.4573*                              | -2.2719                | 0.6638                                            | -1.2159                | 0.5944                                        | -1.4589                |
| Prot-1_80m                                   | 0.4805                               | -1.9691                | 0.7218                                            | -0.8948                | 0.4993                                        | -1.8144                |
| Zn-1_15m                                     | 1.1794                               | 0.4254                 | 1.0340                                            | 0.0882                 | 0.4639                                        | -1.9244                |
| VitC-1_130m                                  | 0.7054                               | -0.9959                | 0.5611                                            | -1.6852                | 1.3828                                        | 0.8996                 |
| Iron-1_30m                                   | 1.5119                               | 1.2419                 | 1.2012                                            | 0.5628                 | 0.6375                                        | -1.3151                |
| K-1_2200l                                    | 1.2631                               | 0.6756                 | 1.2777                                            | 0.7245                 | 0.8308                                        | -0.5212                |
| Energy-5_2700m                               | 1.3806                               | 0.8907                 | 0.9775                                            | -0.0640                | 0.9246                                        | -0.2103                |
| Prot-5_80m                                   | 0.7950                               | -0.6114                | 1.0017                                            | 0.0047                 | 0.5430                                        | -1.5830                |
| Zn-5_15m                                     | 1.8395                               | 1.7396                 | 2.0192*                                           | 2.0498                 | 0.6301                                        | -1.2815                |
| Calcium__800m                                | 1.6071                               | 1.3102                 | 1.5000                                            | 1.1443                 | 0.7070                                        | -0.9308                |
| VitC-5_130m                                  | 0.8588                               | -0.3807                | 0.7428                                            | -0.7599                | 1.0715                                        | 0.1681                 |
| Iron-5_30m                                   | 1.6898                               | 1.5761                 | 1.6532                                            | 1.5436                 | 0.7166                                        | -0.9732                |
| Na-5_4000m                                   | 3.3526*                              | 3.4002                 | 2.5961*                                           | 2.7405                 | 0.9427                                        | -0.1611                |
| K-5_5000m                                    | 3.8911*                              | 3.5939                 | 2.5909*                                           | 2.5737                 | 0.9382                                        | -0.1638                |
| K-5_4000m PP                                 | 1.8417                               | 1.7864                 | 1.6561                                            | 1.5083                 | 0.9448                                        | -0.1614                |
| K-5_3000m                                    | 1.8864                               | 1.8889                 | 1.5277                                            | 1.2891                 | 0.9388                                        | -0.1824                |

Note: n=number; OR: Odds Ratio and testing with population OR=1; €: Estimated after 'log' transformation;; \*: Statistically Significant as 'Z' value is either greater than 1.96 or smaller than -1.96 and therefore included in 'Logistic Model'; several variables dummy (binary) coded as per investigator discretion and shown in Table 3; m:more; l:less; MCID: minimum clinically important difference (for pain VAS = 1 cm)

## Supplement File 1\_Additional Results

Table 8: Logistic regression models (with stepwise forward) in a randomized controlled diet intervention study of symptomatic rheumatoid arthritis (RA) to determine predictors of low pain (4 cm or less on VAS) at study completion (16 weeks): Shows variables (predictors) with significant regression coefficients (Odds ratio) as output in 4 Models

| Dependent Variable                            | Group Independent Variables and Method                                                                                                                                                                                                                                                                                                                                                                                                                                                                                                                                                                   | R2   | Predictor (Odds Ratio)                                                                                                                                                           |
|-----------------------------------------------|----------------------------------------------------------------------------------------------------------------------------------------------------------------------------------------------------------------------------------------------------------------------------------------------------------------------------------------------------------------------------------------------------------------------------------------------------------------------------------------------------------------------------------------------------------------------------------------------------------|------|----------------------------------------------------------------------------------------------------------------------------------------------------------------------------------|
| Pain VAS less than 40 cms on study completion | METHOD=ENTER:age_40less,RA>5 years, tobacco, menopause, BMI_25m,JCPT1_7m,JCSW1_2m,HAQ1_6m,PGA1_3m,P.A.D1_3m, GHA1_60less, EMS1_30m,RAPS1_60m,DAS1_5.1m , SF36P1_40l,SF36M1_40l,ESR1_50m, CRP1_12m,RF1_120m,MTX1_16m, MTX1_yes,MTX_SZP1_yes, PRED1_Yes, Pred1_6m,NSAID1_Yes, Combo1_Yes, ComboP1_Yes,MTX5_16more,MTX5 Yes, RED5_Yes,Pred5_6m, NSAID5_Yes, Combo5_yes,SrCort1, K_Arm ,K5_diet arm,SRK1_40ml,UrineK1_40m, ENERGY1_2700m,Prot1_80m, ZINC1_15m,VITC1_130m, IRON1_30m, K1_2200l,ENERGY5_2700M,Prot5_80m,ZINC5_15m,CALCIUM5_800M, VITC5_130m, IRON5_30m,Na5_4000 m, K5_5000m,K5_4000m, K5_3000m | 60.7 | Menopause (0.138), HAQ1_6m (0.225), GHA1_60less (0.129), DAS28_1_5more (12.51), RF1_120 more (4.65), MTX1_yes (108.09), Pred5_6more(0.055), K5diet arm (9.58), K5_5000m (20.893) |
|                                               | METHOD=STEPWISE FORWARD; ALL VARIABLES AS ABOVE IN THE EQUATION; 6 steps to achieve optimum outcome                                                                                                                                                                                                                                                                                                                                                                                                                                                                                                      | 32.9 | RA duration >5years (0.29), HAQ1_6more(0.346), <b>MTX1_yes (16.096)</b> , MTX_SZP1_yes (0.078) Pred5_6m (0.327), <b>K5_5000m (2.876)</b>                                         |
|                                               | METHOD=ENTER (Selected variables): age_40less,RA>5 years, menopause JCSW_1_2m P.A.D_1_3m, Pred_5_6m, K_Arm,ENERGY_1_2700more , Na_5_4000more, K_5_5000more                                                                                                                                                                                                                                                                                                                                                                                                                                               | 33   | MTX1_yes (2.818), UrineK1_40 more, (0.42), RA duration > 5 year (0.341), HAQ1_6more (0.503), Menopause (0.51), GHA1_60less (0.376), ZINC5_15more (1.941)                         |
|                                               | METHOD= STEPWISE FORWARD; ALL THE ABOVE SELECTED VARIABLES IN THE EQUATION; 4 steps.                                                                                                                                                                                                                                                                                                                                                                                                                                                                                                                     | 25.3 | RA duration>5years (0.295), HAQ1_6more(0.376), MTX1_yes (2.498), <b>K5_5000more (3.145)</b>                                                                                      |

## Supplement File 1\_Additional Results

Note: All models achieved good fit; n: number; R2:percent of the variation explained by the predictors ,as per the method of Nagelkerke; See Table 6 for abbreviations

## Supplement File 1\_Additional Results

Fig 1: Diet Brochure Provided to Patients for Their Daily Meal Plans to Augment Potassium in the Diet: A Controlled Study of Diet and Food based K intervention in patients suffering from active symptomatic Rheumatoid Arthritis (RA) and Continuing Background Standard RA Medication

|                                                                                                                                                                                                                                                                                                                                            |                                                                                                                                                                                                                                                                                                                                                                                                                                                                                                                                                                                                                                                                                                                                                                                                                                                                                                                                                                                                                                                                                                                                                                                                                                                                                                                                                                                                                                                                                                                                                                                                                                      |
|--------------------------------------------------------------------------------------------------------------------------------------------------------------------------------------------------------------------------------------------------------------------------------------------------------------------------------------------|--------------------------------------------------------------------------------------------------------------------------------------------------------------------------------------------------------------------------------------------------------------------------------------------------------------------------------------------------------------------------------------------------------------------------------------------------------------------------------------------------------------------------------------------------------------------------------------------------------------------------------------------------------------------------------------------------------------------------------------------------------------------------------------------------------------------------------------------------------------------------------------------------------------------------------------------------------------------------------------------------------------------------------------------------------------------------------------------------------------------------------------------------------------------------------------------------------------------------------------------------------------------------------------------------------------------------------------------------------------------------------------------------------------------------------------------------------------------------------------------------------------------------------------------------------------------------------------------------------------------------------------|
| <p><b><i>RHEUMATOID ARTHRITIS<br/>AND POTASSIUM<br/>RICH FOOD</i></b></p>  <p><b><i>PATIENT DIET ADVICE<br/>BROCHURE</i></b></p> <p><b><i>Center for Rheumatic Disease<br/>(CRD), Pune</i></b></p> <p><b><i>Tel: 02026344099<br/>02026355204</i></b></p> | <p>Diet plays important role in Rheumatoid Arthritis (RA) but there is limited scientific evidence. It is difficult for patients to have properly cooked food with adequate protein, vitamins and essential minerals. Also they should not put on excess body weight which can worsen symptoms of RA. Besides improving general health, diet may helps in reducing the severity and improving the control of arthritis. It is possible that symptom like pain can be managed to some extent to suitable dietary changes.</p> <p>A recent study from Iran in women with RA suggested that K+ supplement to diet reduced pain in joints. We recently carried out a study of patients suffering from RA in the Center for Rheumatic Diseases, Pune; to measure the dietary contents in patients of RA and found that the local diet was not sufficient in K. However this was an early limited study. We now need to understand in a large study to evaluate the role of K+ in diet in patients with RA. This study has been approved by independent Ethical Committee of the institute.</p> <p>We will be providing you advice regarding increase K+ in diet through eating K+ rich foods and some dietary supplement. Please follow the advice described below. Make sure you choose daily cereals or pulses or vegetable or fruits from the items listed below. You are welcome to eat different diet items on different days of week. For example: daily diet may be 3-4 chapatis or Bhakris or 2 katoris dal along with 1 katori vegetable and 1 fruit. You may like to divide the daily requirement between lunch and dinner.</p> |
|--------------------------------------------------------------------------------------------------------------------------------------------------------------------------------------------------------------------------------------------------------------------------------------------------------------------------------------------|--------------------------------------------------------------------------------------------------------------------------------------------------------------------------------------------------------------------------------------------------------------------------------------------------------------------------------------------------------------------------------------------------------------------------------------------------------------------------------------------------------------------------------------------------------------------------------------------------------------------------------------------------------------------------------------------------------------------------------------------------------------------------------------------------------------------------------------------------------------------------------------------------------------------------------------------------------------------------------------------------------------------------------------------------------------------------------------------------------------------------------------------------------------------------------------------------------------------------------------------------------------------------------------------------------------------------------------------------------------------------------------------------------------------------------------------------------------------------------------------------------------------------------------------------------------------------------------------------------------------------------------|

## Supplement File 1\_Additional Results

Fig 1 (Continued)

|                                                                                                                                                                                                                                                                                                                                                                                                                                                                                                                                                                                                                                                                                                                                                                                                                                                     |                                                                                                                                                                                                                                                                                                                                                                                                                                                                                                                                                                                                                                                                                                                                                                                                                                                                                               |
|-----------------------------------------------------------------------------------------------------------------------------------------------------------------------------------------------------------------------------------------------------------------------------------------------------------------------------------------------------------------------------------------------------------------------------------------------------------------------------------------------------------------------------------------------------------------------------------------------------------------------------------------------------------------------------------------------------------------------------------------------------------------------------------------------------------------------------------------------------|-----------------------------------------------------------------------------------------------------------------------------------------------------------------------------------------------------------------------------------------------------------------------------------------------------------------------------------------------------------------------------------------------------------------------------------------------------------------------------------------------------------------------------------------------------------------------------------------------------------------------------------------------------------------------------------------------------------------------------------------------------------------------------------------------------------------------------------------------------------------------------------------------|
| <p>Diet advice:</p> <p>Cereal: In the form of Chapatti or Bhakri (4 chapati or bhakri in standard size in a day made of Ragi or Wheat flour or Jawar or Bajra )</p> <p>Ragi or wheat Jowar Bajra</p>  <p>Pulses: In the form of gravy (2 katori daily)</p> <p>Mung dal or Chawli or Tur dal</p>  <p>Vegetable: In the form of bhaji (2 katori daily)</p> <p>Shevga or Brinjal or Karela</p>  <p>Fruits: Take 1 Musambi and 1 Banana in the morning and evening</p>  <p>2 Musambi or 2 banana in a day</p> | <p><u>Do's</u></p> <ul style="list-style-type: none"> <li>➤ Drink lots of water, at least 2 liters in a day.</li> <li>➤ You can consume common and popular vegetable like potato, onion garlic and home made chutney ( pudina and green chilies).</li> <li>➤ Methi seeds are also good source of K+ and you may take them as lado</li> <li>➤ Methi seeds are also good source of K+ and you may take them as lado</li> <li>➤ Jaggary may be eaten in any form of like puran poli.</li> </ul> <p><u>Don't</u></p> <ul style="list-style-type: none"> <li>➤ Avoid oily and spicy food. You may use vegetable oil like ground nut or sunflower to cook food.</li> <li>➤ Avoid tobacco use</li> <li>➤ Avoid excess salt in diet. Don't add salt in cooked food.</li> <li>➤ Avoid pickle and chutney or salted snacks like peanut and wafers.</li> <li>➤ Don't fast or eat special food</li> </ul> |
|-----------------------------------------------------------------------------------------------------------------------------------------------------------------------------------------------------------------------------------------------------------------------------------------------------------------------------------------------------------------------------------------------------------------------------------------------------------------------------------------------------------------------------------------------------------------------------------------------------------------------------------------------------------------------------------------------------------------------------------------------------------------------------------------------------------------------------------------------------|-----------------------------------------------------------------------------------------------------------------------------------------------------------------------------------------------------------------------------------------------------------------------------------------------------------------------------------------------------------------------------------------------------------------------------------------------------------------------------------------------------------------------------------------------------------------------------------------------------------------------------------------------------------------------------------------------------------------------------------------------------------------------------------------------------------------------------------------------------------------------------------------------|



## Supplement File 1\_Additional Results



**TEST REPORT**

|                                                                                                                                                                                 |  |                                               |  |
|---------------------------------------------------------------------------------------------------------------------------------------------------------------------------------|--|-----------------------------------------------|--|
| <b>Analytical Report Number:</b> QL/MI/18/0005                                                                                                                                  |  | <b>Report Date:</b> 29.01.2018                |  |
| <b>Manufacturer's/Customer Name:</b><br>M/s. ARTHRITIS RESEARCH AND CARE FOUNDATION<br>CENTER FOR RHEUMATIC DISEASES                                                            |  | <b>Manufacturer's Licence No.:</b> NA         |  |
| <b>Issued to:</b><br>M/s. ARTHRITIS RESEARCH AND CARE FOUNDATION<br>CENTER FOR RHEUMATIC DISEASES<br>No.11, Hemes Elegance, 1988, Convent Street,<br>Camp, Pune: 411001, INDIA. |  | <b>Customer Reference:</b> NA                 |  |
|                                                                                                                                                                                 |  | <b>Date of Receipt:</b> 12.07.2017            |  |
|                                                                                                                                                                                 |  | <b>Date of Completion of Test:</b> 24.01.2018 |  |
| <b>Sample Nature/ Name:</b> CRD PUNE K-JOINT<br>30°C/75%RH, 6M                                                                                                                  |  | <b>Batch Number:</b> NA                       |  |
|                                                                                                                                                                                 |  | <b>Batch size:</b> NA                         |  |
| <b>Sample Condition:</b> Received in a container.                                                                                                                               |  | <b>Manufacture Date:</b> NA                   |  |
|                                                                                                                                                                                 |  | <b>Expiry Date:</b> NA                        |  |

| S. No                                               | Test Parameters       | Specification Limit   | Results      |
|-----------------------------------------------------|-----------------------|-----------------------|--------------|
|                                                     | Description           | Brown coloured powder |              |
| <b>I) Nutritional Labelling, Each 100g Contains</b> |                       |                       |              |
| 1                                                   | Calories, g           | Record the value      | 380.42       |
| 2                                                   | Total Protein, g      | Record the value      | 17.8         |
| 3                                                   | Total Carbohydrate, g | Record the value      | 77.56        |
| 4                                                   | Total Fat, g          | Record the value      | 0.49         |
| 5                                                   | Vitamin A             | Record the value      | Not detected |
| 6                                                   | Vitamin D             | Record the value      | Not detected |
| 7                                                   | Vitamin E             | Record the value      | Not detected |
| 8                                                   | Vitamin B1            | Record the value      | Not detected |
| 9                                                   | Vitamin B2            | Record the value      | Not detected |
| 10                                                  | Vitamin B3            | Record the value      | Not detected |
| 11                                                  | Vitamin B4            | Record the value      | Not detected |
| 12                                                  | Vitamin C             | Record the value      | Not detected |
| 13                                                  | Calcium as Ca, g      | Record the value      | 0.78         |

**PADM Laboratories Pvt. Ltd.**  
# 453/A, 12th Cross, 4th Phase, Peenya Industrial Area, Bangalore - 560 058, Karnataka, INDIA Page 1 of 2  
Ph : 080-28368181 / 28368182 E-mail : info@padmlab.com www.padmlab.com



|                               |                                 |                  |                       |
|-------------------------------|---------------------------------|------------------|-----------------------|
| 14                            | Potassium as K, g               | Record the value | 2.36                  |
| 15                            | Zinc as Zn, g                   | Record the value | 3.6                   |
| 16                            | Selenium as Se, g               | Record the value | Below detection limit |
| 17                            | Magnesium as Mg, g              | Record the value | 0.45                  |
| 18                            | Iron as Fe, mg/kg               | Record the value | 45.42                 |
| 19                            | Sodium as Na, in %              | Record the value | 2.36                  |
| <b>II) Microbial Analysis</b> |                                 |                  |                       |
| 1                             | Total Aerobic Microbial count/g | Record the value | 556 cfu               |
| 2                             | Staphylococcus aureus/g         | Record the value | Less than 10 cfu      |
| 3                             | Escherichia coli/g              | Record the value | Absent                |
| 4                             | Yeast and Mould count/g         | Record the value | Less than 10cfu       |
| 5                             | Salmonella/25g                  | Record the value | Absent                |
| 6                             | Pseudomonas Aeruginosa/g        | Record the value | Absent                |

Prepared By:  29/01/18

Checked By:  29/01/18

Authorised signatory:  29/01/18
